# Supplementary material for: Incidence, risk factors and risk prediction of hospital-acquired suspected adverse drug reactions: a prospective cohort of Ugandan inpatients
Source: PubMed Central journal article supplement (PMC5253535; doi:10.1136/bmjopen-2015-010568), 2017-01-20
Supplement: bmjopen-2015-010568supp_appendices.pdf [file bmjopen-2015-010568supp_appendices.pdf]

## Appendix S1: Use of risk-scores to predict actual ADR cases

### Risk-scores for predicting actual cases of possible and probable hospital-acquired ADRs

Risk-score ( $r_i$ ) for patient  $i = \ln [\text{Odds of an ADR for patient } i] = \text{constant} + \beta_1 X_{1i} + \beta_2 X_{2i} + \dots + \beta_n X_{ni}$ : where  $\beta_1, \beta_2$  to  $\beta_n$  are regression coefficients of the ADR risk factors  $X_1, X_2$  to  $X_n$  in the final ADR logistic regression model, and  $\ln$  is the natural logarithm.

Thus, the *probable* ADR risk-score was computed as follows;

Risk-score for *probable* ADR =  $-2.807 - 0.317$  (if HIV-positive) +  $0.505$  (if Charlson's Index  $\geq 3$ ) +  $0.673$  (if patient used herbal medicines in 4-weeks prior to admission) +  $0.291$  (if male) +  $0.582$  (if female) +  $0.838$  (if patient was administered six or more conventional medicines) –  $(0.010 \cdot \text{age in years})$ ;

And the *possible* ADR risk-score was calculated as follows;

Risk-score for *possible* ADR =  $-2.19 - 0.589$  (if HIV-positive) -  $0.613$  (if Charlson's Index  $\geq 3$ ) +  $0.519$  (if patient used herbal medicines in 4-weeks prior to admission) +  $0.011$  (if male) +  $0.022$  (if female) +  $1.001$  (if patient was administered six or more conventional medicines) –  $(0.0006 \cdot \text{age in years}) + 1.235$  (HIV-positive and Charlson's index  $\geq 3$ ) +  $0.448$  (if hospitalized in past 3-months) +  $0.771$  (if Gynaecological ward).

But  $\ln [\text{Odds of an ADR for patient } i] = \ln [P_i/(1-P_i)]$ :

And so  $\ln [P_i / (1-P_i)] = r_i$  where  $P_i$  is the probability of an ADR and  $r_i$  is risk-score.

$$P_i/(1-P_i) = \exp (r_i) = e^{r_i}$$

$$P_i = e^{r_i} (1-P_i)$$

$$P_i (1 + e^{r_i}) = e^{r_i}$$

$$P_i = e^{r_i} / (1 + e^{r_i})$$

$$P_i = \exp(\text{Patient's risk-score}) / [1 + (\text{Patient's risk-score})]$$

Subsequently, the probability of a *possible/probable* ADR ( $P_i$ ) was calculated using the patient's risk-score ( $r_i$ ):

Probability for a *possible/probable* ADR =  $\exp(\text{Patient's risk-score}) / [1 + (\text{Patient's risk-score})]$ .

Frequency distributions of *possible/probable* ADR probabilities were generated for: i) patients who developed a *possible/probable* ADR and; ii) for the whole sample of 762 patients. The 30<sup>th</sup> percentile of *possible/probable* ADR probabilities distribution among the 762 patients was marked off, and patients from list i) with at most the same probability who had nonetheless experienced a *possible/probable* ADR were identified (*low-risk* group). A similar method was used to identify patients whose probability of *possible/probable* ADR was above the 90<sup>th</sup> percentile and who had indeed developed a *possible/probable* ADR (*high-risk* group). The *possible/probable* ADR cases in the lowest *three* deciles (*low-risk* group) versus the topmost decile (*high-risk* group) were identified using Stata and qualitatively assessed for any peculiarities in certain aspects (number of implicated drug classes, ward if *probable* ADR, number of working diagnoses per patient, number of ADRs per patient and nature of *possible/probable* ADR) - *not* so much in the characteristics used to compute the risk-score (gender, age, use of  $\geq 6$  conventional medicines, use of herbal medicines, being HIV-positive, Charlson's co-morbidity index  $\geq 3$  and ward if *possible* ADR).

### Characteristics of *probable* ADR cases predicted using logistic regression risk-scores

Fourteen patients with 22 *probable* suspected ADRs were in the *low-risk* (lowest 30%) group of the *probable* ADR risk distribution. Only one patient self-reported having used herbal medicines in the 4-weeks prior to hospitalization although no details of herbal medicines used were given. Two patients had received  $\geq 6$  conventional medicines during hospitalization and three were HIV-positive. Two patients on the IDGI ward experienced *probable* hospital-acquired suspected ADRs linked to medication administration errors: the ADRs were nausea (working diagnoses: septicaemia secondary to urinary tract infection and electrolyte imbalance) and vomiting (working diagnoses: immune-suppressed syndrome with oral candidiasis, delirium, Wernicke's encephalopathy and toxoplasmosis) linked to rapid intravenous infusions of ciprofloxacin and ceftriaxone, respectively. A patient experienced blurred vision linked to Benztropine (diagnosis: organic psychosis and resolving Lyme meningitis).

Sixteen patients with 17 *probable* suspected ADRs were in the *high-risk* (top 10%) group of the *probable* ADR risk distribution, all of whom had received  $\geq 6$  conventional medicines during hospitalization, were female, and had used herbal medicines in the 4-weeks pre-admission. Most patients did not provide details of the herbal medicines they had used or the information reported was vague [11/16; no details (7/11) and vague (4/11)]. Among the five patients with details, six herbal medicines were mentioned; Sere (*Bidens pilosa*), avocado leaves (*Persea americana*), Beet root (*Beta vulgaris*), Father Anatoli proprietary herbal concoction, garlic mixture (*Allium sativum*), and aloe vera (*Aloe barbadensis*). A patient presented with jaundice linked to bisacodyl (working diagnosis: sickler in vasocclusive crisis).

## Qualitative differences in the predicted *low-risk* vs. *high-risk probable* ADR cases

### Implicated drug classes

Six of the seven ADR-implicated drug classes (antibacterials, analgesics, cardiovascular drugs, antimalarials, uterotonics, and antipsychotics) among the 14 cases in the *probable* ADR *low-risk* group were also implicated among the 16 cases in the *high-risk* group. Six additional drug classes were, nonetheless, identified in the *high-risk* group of *probable* ADR risk distribution which included antidepressants, benzodiazepines, contraceptives, laxatives, anaesthetics and antiulcer agents.

### Ward

The HNE ward did not have any *probable* suspected ADR cases (0/14) in the *low-risk* group of *probable* ADR risk distribution but had three patients (3/16) in the *high-risk* group, a statistically significant difference.

### Working diagnosis

No noticeable differences were observed in the number of working diagnoses per patient, by ward, in the *high-risk* vs. *low-risk* groups of *probable* ADR risk distribution at a cut-off point of  $\geq 3$  diagnoses, respectively: GYN [(0/5) vs. (3/5)]; IDGI [(7/7) vs. (1/3)]; HNE [(2/3) vs. (no cases)]; and CPN [(1/1) vs. (2/3)].

### Number of *probable* ADRs per patient

The occurrence of two or more *probable* ADRs per patient was more common among patients in the *low-risk* group (6/14) versus those in the *high-risk* group (3/16) of *probable* ADR risk distribution, but this difference was not statistically significant.

### Characteristics of possible ADR cases predicted using logistic regression risk-scores

Thirty-one patients with 49 possible suspected ADRs were in the *low-risk* group of the possible ADR risk distribution. Only four of 31 patients reported having taken herbal medicines in the 4-weeks pre-admission. One patient had used avocado leaves while the other three patients gave no details. Six (6/31) patients had received  $\geq 6$  conventional medicines during hospitalization. Eight patients were HIV-positive and 10 were on the GYN ward. A patient experienced decreased urine output after receiving ceftriaxone (working diagnosis: immune suppressed syndrome and bronchopneumonia). One case of nausea due to rapid ciprofloxacin infusion, as mentioned above in the *low-risk* group of *probable* ADR, was also observed here.

Thirty-five patients with 74 possible suspected ADRs were in the *high-risk* group of the possible ADR risk distribution, all of whom had received  $\geq 6$  conventional medicines during hospitalization. Twenty-five (25/35) patients reported having used herbal medicines in the 4-weeks pre-admission. Half (12/25) the patients who reported having used herbal medicines pre-admission provided details of the herbal medicines they had used which included: *Bidens pilosa*, beet root, avocado leaves or seed concoction, Father Anatoli proprietary herbal concoction, Emumbwa, Ekigaranga, unknown liquid, *Hoslundia opposita* (Kamunye), aloe vera, and Ekikatula herbal drink.

### Qualitative differences in the predicted low-risk vs. high-risk possible ADR cases

#### Implicated drug classes

Seven of the eight ADR-implicated drug classes [antibacterials, analgesics, cardiovascular drugs, antimalarials, uterotonics, antifungals and antipsychotics but excluding anticholinergics (one case)] among the 31 cases in the *low-risk* group of possible ADR risk distribution were also implicated among the 35 cases in the *high-risk* group. However, 11 additional drug classes were identified in the *high-risk* group [blood (2), iron supplements (2)

and one case of each of the following drug classes: antifibrinolytics, antidepressants, benzodiazepines, contraceptives, laxatives, calcium supplements, antituberculous drugs, bronchodilator-xanthine derivatives, and antihistamine].

#### Ward

Only one patient out of 31 with *possible* suspected ADRs was predicted on the HNE ward in the *low-risk* group of *possible* ADR risk distribution and four of 35 in the *high-risk* group, but with no statistically significant difference. However, ward was one of the risk factors used to compute risk-scores for *possible* hospital-acquired suspected ADRs.

#### Working diagnosis

No noticeable differences were observed in the number of working diagnoses per patient, by ward, in the *high-risk* vs. *low-risk* groups of *possible* ADR risk distribution at a cut-off point of  $\geq 3$  diagnoses, respectively: GYN [(5/17) vs. (1/10)]; IDGI [(4/4) vs. (7/10)]; HNE [(1/3) vs. (0/1)]; and CPN [(3/5) vs. (6/10)].

#### Number of *possible* ADRs per patient

Two or more *possible* ADRs per patient were more common in the *high-risk* (18/35) vs. *low-risk* (10/31) groups of *possible* ADR risk distribution, but not statistically significant.

#### Nature of *possible/probable* ADR cases

There was little to chose, by nature of ADR, between ADR cases described in the *high-risk* vs. *low-risk* groups of *possible* ADRs, and likewise of *probable* ADRs. However, we take note of the more frequent occurrence of cardiovascular ADRs in the *high-risk* groups of *possible* [top 10% (8/35) vs. lowest 30% (1/31)] and, less impressively, *probable* [top 10% (2/16) vs. lowest 30% (1/14)] ADRs.

Summary of qualitative differences between ADR cases in the *high-risk* vs. *low-risk* groups

Subtle qualitative differences were observed in the characteristics of the predicted *high-risk* vs. *low-risk* ADR cases with a similar trend for both *possible* and *probable* hospital-acquired suspected ADRs. *High-risk* groups implicated more drug classes [*possible* (18 vs. 8) and *probable* (14 vs. 7) ADRs], had more cardiovascular ADRs, and more ADR cases on the HNE ward [(4/35) vs. (1/31) for *possible* ADRs – though used in computing the risk-score; (3/16) vs. (0/14) for *probable* ADRs]; but with no noticeable difference in the number of working diagnoses per patient and the number of ADRs per patient. Furthermore, the herbal medicines used by the actual ADR cases were seldom specified.

Appendix S2: Characteristics of 14 patients with *probable* hospital-acquired suspected ADRs in the lowest 30% (low-risk group) of *probable* ADR risk distribution, Uganda, 2014

| Probability-<br><i>probable</i><br>ADR | age | gender | ward | No of drugs<br>administered | Herbal<br>medicines | charlson's<br>index | HIV-positive        | Hospita<br>lization | Working diagnosis                                                                                                         | <i>Probable</i> ADR                             | Implicated drug             | Causality |
|----------------------------------------|-----|--------|------|-----------------------------|---------------------|---------------------|---------------------|---------------------|---------------------------------------------------------------------------------------------------------------------------|-------------------------------------------------|-----------------------------|-----------|
| 0.069                                  | 28  | Female | GYN  | Less than six drugs         | No                  | 3+                  | Positive            | No                  | MISSED ABORTION,<br>INCOMPLETE ABORTION,<br>CORPUS LUTEAL CYST                                                            | DIARRHOEA                                       | AMPICLOX                    | Probable  |
|                                        |     |        |      |                             |                     |                     |                     |                     |                                                                                                                           | LOWER ABDOMINAL PAIN                            | MISOPROSTOL                 | Probable  |
| 0.058                                  | 28  | Female | GYN  | Less than six drugs         | No                  | Two or less         | Negative or unknown | No                  | BLIGHTED OVUM                                                                                                             | DIARRHOEA                                       | MISOPROSTOL                 | Probable  |
| 0.060                                  | 25  | Female | GYN  | Less than six drugs         | No                  | Two or less         | Negative or unknown | No                  | MALARIA IN PREGNANCY                                                                                                      | TINNITUS                                        | QUININE                     | Probable  |
|                                        |     |        |      |                             |                     |                     |                     |                     |                                                                                                                           | DIZZINESS                                       | QUININE                     | Probable  |
|                                        |     |        |      |                             |                     |                     |                     |                     |                                                                                                                           | PALPITATIONS                                    | QUININE                     | Probable  |
| 0.062                                  | 20  | Female | GYN  | Less than six drugs         | No                  | Two or less         | Negative or unknown | Yes                 | MALARIA IN PREGNANCY                                                                                                      | TINNITUS                                        | QUININE                     | Probable  |
| 0.060                                  | 24  | Female | GYN  | Less than six drugs         | No                  | Two or less         | Negative or unknown | No                  | MALARIA IN PREGNANCY                                                                                                      | VAGINAL BLEEDING                                | QUININE                     | Probable  |
|                                        |     |        |      |                             |                     |                     |                     |                     |                                                                                                                           | LOWER ABDOMINAL PAIN                            | QUININE                     | Probable  |
| 0.055                                  | 34  | Female | GYN  | Less than six drugs         | No                  | Two or less         | Negative or unknown | No                  | MISSED ABORTION                                                                                                           | DIARRHOEA                                       | MISOPROSTOL                 | Probable  |
|                                        |     |        |      |                             |                     |                     |                     |                     |                                                                                                                           | VAGINAL BLEEDING                                | MISOPROSTOL                 | Probable  |
|                                        |     |        |      |                             |                     |                     |                     |                     |                                                                                                                           | LOWER ABDOMINAL PAIN                            | MISOPROSTOL                 | Probable  |
| 0.047                                  | 22  | Male   | IDGI | Less than six drugs         | No                  | Two or less         | Negative or unknown | No                  | SEPTICAEMIA SECONDARY TO<br>URINARY TRACT INFECTION,<br>ELECTROLYTE IMBALANCE                                             | NAUSEA (REDUCED INFUSION<br>RATE & ADR REDUCED) | CIPROFLOXACIN               | Definite  |
| 0.058                                  | 52  | Male   | IDGI | Six or more drugs           | No                  | Two or less         | Positive            | Yes                 | IMMUNE SUPPRESSED<br>SYNDROME (ISS) WITH ORAL<br>CANDIDIASIS, DELIRIUM,<br>WERNICKE'S<br>ENCEPHALOPATHY,<br>TOXOPLASMOSIS | VOMITING - RAPID INFUSION                       | CEFTRIAZONE                 | Definite  |
| 0.068                                  | 35  | Male   | IDGI | Six or more drugs           | No                  | Two or less         | Positive            | Yes                 | LIVER CIRRHOSIS,<br>ABDOMINAL LYMPHOMA,<br>ABDOMINAL TUBERCULOSIS                                                         | CONSTIPATION                                    | MORPHINE                    | Probable  |
| 0.052                                  | 40  | Female | IDGI | Less than six drugs         | No                  | Two or less         | Negative or unknown | Yes                 | ORGANIC PSYCHOSIS,<br>RESOLVING LYME                                                                                      | TREMORS                                         | HALOPERIDOL                 | Probable  |
|                                        |     |        |      |                             |                     |                     |                     |                     |                                                                                                                           | BLURRED VISION                                  | BENZTROPINE                 | Probable  |
| 0.044                                  | 28  | Male   | IDGI | Less than six drugs         | No                  | Two or less         | Negative or unknown | Yes                 | ORGANOPHOSPHATE<br>POISONING, ATTEMPTED<br>SUICIDE                                                                        | DROWZINESS                                      | ATROPINE                    | Probable  |
| 0.044                                  | 29  | Male   | CPN  | Less than six drugs         | No                  | Two or less         | Negative or unknown | No                  | BRONCHOPNEUMONIA, RULE<br>OUT PULMONARY<br>TUBERCULOSIS (PTB), LOBAR<br>PNEUMONIA                                         | HEADACHE                                        | CEFTRIAZONE                 | Probable  |
| 0.067                                  | 52  | Male   | CPN  | Less than six drugs         | Yes                 | Two or less         | Negative or unknown | No                  | LOBAR PNEUMONIA, ?PTB                                                                                                     | DIARRHOEA                                       | ERYTHROMYCIN                | Probable  |
|                                        |     |        |      |                             |                     |                     |                     |                     |                                                                                                                           | ABDOMINAL PAIN                                  | DICLOFENAC,<br>ERYTHROMYCIN | Probable  |
| 0.055                                  | 85  | Female | CPN  | Less than six drugs         | No                  | 3+                  | Negative or unknown | No                  | HYPERTENSION, ATRIAL<br>FIBRILLATION, ISCHAEMIC<br>HEART DISEASE, COMPLETE<br>HEART BLOCK                                 | COUGH                                           | CAPTOPRIL                   | Probable  |

**Appendix S3: Characteristics of 16 patients with *probable* hospital-acquired suspected ADRs in the top 10% (high-risk group) of *probable* ADR risk distribution, Uganda, 2014**

| Probability - <i>probable</i> ADR | age | gender | ward | No of drugs administered | Herbal medicines | charlson's index | HIV-positive        | Hospitalization | Working diagnosis                                                                          | <i>Probable</i> ADR   | Implicated drug                        | Causality |
|-----------------------------------|-----|--------|------|--------------------------|------------------|------------------|---------------------|-----------------|--------------------------------------------------------------------------------------------|-----------------------|----------------------------------------|-----------|
| 0.223                             | 25  | Female | GYN  | Six or more drugs        | Yes              | Two or less      | Negative or unknown | No              | INEVITABLE ABORTION, INCOMPLETE ABORTION                                                   | VOMITING              | CEFTRIAXONE                            | Probable  |
| 0.221                             | 26  | Female | GYN  | Six or more drugs        | Yes              | Two or less      | Negative or unknown | No              | INCOMPLETE ABORTION, MENORRHAGIA                                                           | VAGINAL BLEEDING      | MISOPROSTOL                            | Definite  |
| 0.225                             | 24  | Female | GYN  | Six or more drugs        | Yes              | Two or less      | Negative or unknown | Yes             | POST OPERATIVE SEPSIS, RUPTURED ECTOPIC                                                    | GENERAL BODY WEAKNESS | LEVOFLOXACIN, DIAZEPAM                 | Probable  |
|                                   |     |        |      |                          |                  |                  |                     |                 |                                                                                            | HEADACHE              | LEVOFLOXACIN, CEFTRIAXONE, HALOPERIDOL | Probable  |
| 0.228                             | 22  | Female | GYN  | Six or more drugs        | Yes              | Two or less      | Negative or unknown | Yes             | SEVERE ANAEMIA, SECONDARY MENORRHAGIA                                                      | HEADACHE              | MICROGYNON                             | Probable  |
| 0.218                             | 28  | Female | GYN  | Six or more drugs        | Yes              | Two or less      | Negative or unknown | No              | CHRONIC LEAKING ECTOPIC PREGNANCY, THREATENED ABORTION                                     | PARAESTHESIA          | LIGNOCAINE                             | Probable  |
| 0.210                             | 85  | Female | IDGI | Six or more drugs        | Yes              | 3+               | Negative or unknown | Yes             | ACUTE EXACERBATION OF PEPTIC ULCER DISEASE (PUD), HPERTENSIVE HEART DISEASE, RECURRENT PUD | HEADACHE              | NIFEDIPINE                             | Probable  |
| 0.199                             | 40  | Female | IDGI | Six or more drugs        | Yes              | Two or less      | Negative or unknown | No              | URINARY TRACT INFECTION, DIABETES MELLITUS TYPE 2 (DM), MALARIA                            | NAUSEA                | CIPROFLOXACIN                          | Definite  |
| 0.250                             | 29  | Female | IDGI | Six or more drugs        | Yes              | 3+               | Positive            | Yes             | HIV COMPLICATED WITH CRYPTOCCAL MENINGITIS (CCM), TUBERCULOSIS (TB)                        | VOMITING              | TRAMADOL                               | Probable  |
| 0.188                             | 47  | Female | IDGI | Six or more drugs        | Yes              | Two or less      | Negative or unknown | No              | ACUTE ON CHRONIC PANCREATITIS, RULE-OUT (R/O) DM, CHRONIC PUD, CHRONIC PANCREATITIS        | VOMITING              | TRAMADOL                               | Probable  |
| 0.253                             | 60  | Female | IDGI | Six or more drugs        | Yes              | 3+               | Negative or unknown | No              | MALARIA, PUD, SEPTICAEMIA, GASTRITIS                                                       | FEVER                 | CEFTRIAXONE, ESOMEPRAZOLE              | Probable  |

| Probability - probable ADR | age | gender | ward | No of drugs administered | Herbal medicines | charlson's index | HIV-positive        | Hospitalization | Working diagnosis                                                                                                                                                                                                     | Probable ADR    | Implicated drug          | Causality |
|----------------------------|-----|--------|------|--------------------------|------------------|------------------|---------------------|-----------------|-----------------------------------------------------------------------------------------------------------------------------------------------------------------------------------------------------------------------|-----------------|--------------------------|-----------|
| 0.222                      | 45  | Female | IDGI | Six or more drugs        | Yes              | 3+               | Positive            | Yes             | IMMUNOSUPRESSED SYNDROME (ISS), CHOLELITHIASIS, STEATOSIS OF LIVER, TB IMMUNE RECONSTITUTION INFLAMMATORY SYNDROME (IRIS), ACUTE LIVER INJURY, DRUG-INDUCED HEPATITIS, SOME DEHYDRATION, VIRAL HEPATITIS, SEPSIS, CCM | HYPOVOLAEMIA    | FRUSEMIDE                | Probable  |
| 0.227                      | 75  | Female | IDGI | Six or more drugs        | Yes              | 3+               | Negative or unknown | No              | HYPERTENSIVE URGENCY, SEPTICAEMIA, R/O MALARIA, ELECTROLYTE IMBALANCE                                                                                                                                                 | NAUSEA          | NIFEDIPINE, ESOMEPRAZOLE | Probable  |
| 0.260                      | 56  | Female | HNE  | Six or more drugs        | Yes              | 3+               | Negative or unknown | Yes             | HYPERGLYCAEMIA, ACUTE GASTROENTERITIS, PUD, MALARIA                                                                                                                                                                   | HYPERTENSION    | AMITRYPTYLLINE           | Probable  |
| 0.212                      | 32  | Female | HNE  | Six or more drugs        | Yes              | Two or less      | Negative or unknown | Yes             | ANAEMIA, MALARIA, ? UPPER GASTROINTESTINAL BLEEDING                                                                                                                                                                   | VOMITING        | LUMARTEM, CIPROFLOXACIN  | Probable  |
| 0.232                      | 20  | Female | HNE  | Six or more drugs        | Yes              | Two or less      | Negative or unknown | Yes             | SICKLER IN VASOCCCLUSIVE CRISIS                                                                                                                                                                                       | JAUNDICE        | BISACODYL                | Probable  |
| 0.228                      | 22  | Female | CPN  | Six or more drugs        | Yes              | Two or less      | Negative or unknown | No              | CHRONIC OBSTRUCTIVE PULMONARY DISEASE, SEPSIS, PTB, BRONCHITIS, PNEUMONITIS, HEPATITIS, BRONCHIAL ASTHMA, COR PULMONALE                                                                                               | EPIGASTRIC PAIN | IBUPROFEN                | Probable  |

**Appendix S4: Characteristics of 31 patients with possible hospital-acquired suspected ADRs in the lowest 30% (low-risk group) of possible ADR risk distribution, Uganda, 2014**

| Probability - possible ADR | age | gender | ward | No of drugs administered | Herbal medicines | charlson's index | HIV-positive | Hospitalization                       | Working diagnosis                                                                           | Possible ADR                         | Implicated drug        |
|----------------------------|-----|--------|------|--------------------------|------------------|------------------|--------------|---------------------------------------|---------------------------------------------------------------------------------------------|--------------------------------------|------------------------|
| 0.196                      | 25  | Female | GYN  | Less than six drugs      | No               | 0                | No           | No                                    | URINARY TRACT INFECTION (UTI) IN PREGNANCY, THREATENED ABORTION                             | HEADACHE                             | TRAMADOL               |
| 0.196                      | 29  | Female | GYN  | Less than six drugs      | No               | 0                | No           | No                                    | MALARIA IN PREGNANCY, VAGINAL CANDIDIASIS, UTI                                              | EPIGASTRIC PAIN                      | DICLOFENAC             |
| 0.196                      | 25  | Female | GYN  | Less than six drugs      | No               | 0                | No           | No                                    | MALARIA IN PREGNANCY                                                                        | NAUSEA                               | QUININE                |
|                            |     |        |      |                          |                  |                  |              |                                       |                                                                                             | WATERY NON-BLOODY DIARRHOEA          | QUININE                |
|                            |     |        |      |                          |                  |                  |              |                                       |                                                                                             | BLURRED VISION                       | QUININE                |
|                            |     |        |      |                          |                  |                  |              |                                       |                                                                                             | TINNITUS                             | QUININE                |
|                            |     |        |      |                          |                  |                  |              |                                       |                                                                                             | PALPITATIONS                         | QUININE                |
|                            |     |        |      |                          |                  |                  |              |                                       |                                                                                             | DIZZINESS                            | QUININE                |
|                            |     |        |      |                          |                  |                  |              |                                       |                                                                                             | TASTE DISTURBANCE & LOSS OF APPETITE | QUININE                |
| 0.196                      | 30  | Female | GYN  | Less than six drugs      | No               | 0                | No           | INTRAUTERINE FOETAL DEATH OF 22 WEEKS | LOWER ABDOMINAL PAIN<br>VOMITING                                                            | MISOPROSTOL<br>MISOPROSTOL           |                        |
| 0.196                      | 28  | Female | GYN  | Less than six drugs      | No               | 0                | No           | BLIGHTED OVUM                         | DIARRHOEA                                                                                   | MISOPROSTOL                          |                        |
| 0.196                      | 34  | Female | GYN  | Less than six drugs      | No               | 0                | No           | No                                    | MISSED ABORTION                                                                             | DIARRHOEA                            | MISOPROSTOL            |
|                            |     |        |      |                          |                  |                  |              |                                       |                                                                                             | LOWER ABDOMINAL PAIN                 | MISOPROSTOL            |
|                            |     |        |      |                          |                  |                  |              |                                       |                                                                                             | VAGINAL BLEEDING                     | MISOPROSTOL            |
| 0.196                      | 25  | Female | GYN  | Less than six drugs      | No               | 0                | No           | MALARIA IN PREGNANCY                  | HEADACHE                                                                                    | QUININE                              |                        |
| 0.197                      | 24  | Female | GYN  | Less than six drugs      | No               | 0                | No           | No                                    | MALARIA IN PREGNANCY                                                                        | LOWER ABDOMINAL PAIN                 | QUININE                |
|                            |     |        |      |                          |                  |                  |              |                                       |                                                                                             | VAGINAL BLEEDING                     | QUININE                |
| 0.196                      | 26  | Female | GYN  | Less than six drugs      | No               | 0                | No           | No                                    | INCOMPLETE MISCARRIAGE                                                                      | LOWER ABDOMINAL PAIN                 | MISOPROSTOL            |
|                            |     |        |      |                          |                  |                  |              |                                       |                                                                                             | VAGINAL BLEEDING                     | MISOPROSTOL            |
| 0.196                      | 29  | Female | GYN  | Less than six drugs      | No               | 0                | No           | No                                    | UTI IN PREGNANCY                                                                            | HEADACHE                             | AMOXIL/CLAVULANATE     |
| 0.150                      | 30  | Female | CPN  | Less than six drugs      | No               | 1                | No           | Yes                                   | HYPERTENSIVE HEART DISEASE, CONGESTIVE CARDIAC FAILURE                                      | EPIGASTRIC PAIN                      | CAPTOPRIL              |
|                            |     |        |      |                          |                  |                  |              |                                       |                                                                                             | DIZZINESS                            | CAPTOPRIL & CARVEDILOL |
| 0.101                      | 32  | Female | CPN  | Less than six drugs      | No               | 0                | No           | No                                    | BRONCHO-PNEUMONIA, ASTHMA, ACUTE BRONCHITIS                                                 | HEADACHE                             | CEFTRIAXONE            |
| 0.146                      | 26  | Female | CPN  | Six or more drugs        | No               | 2                | Yes          | No                                    | ANAEMIA IN IMMUNOSUPPRESSED SYNDROME (ISS), PULMONARY TUBERCULOSIS (PTB) RELAPSE, PNEUMONIA | FEVER                                | CEFTRIAXONE            |
|                            |     |        |      |                          |                  |                  |              |                                       |                                                                                             | DIZZINESS                            | CEFTRIAXONE            |
|                            |     |        |      |                          |                  |                  |              |                                       |                                                                                             | VOMITING                             | CEFTRIAXONE            |
| 0.056                      | 85  | Female | CPN  | Less than six drugs      | No               | 5                | No           | No                                    | HYPERTENSION, ATRIAL FIBRILLATION, ISCHAEMIC HEART DISEASE, COMPLETE HEART BLOCK            | COUGH                                | CAPTOPRIL              |
| 0.102                      | 25  | Female | CPN  | Less than six drugs      | No               | 0                | No           | No                                    | PNEUMONIA, PTB                                                                              | DIARRHOEA                            | CEFTRIAXONE            |
|                            |     |        |      |                          |                  |                  |              |                                       |                                                                                             | FEVER                                | CEFTRIAXONE            |
|                            |     |        |      |                          |                  |                  |              |                                       |                                                                                             | LOSS OF APPETITE                     | METRONIDAZOLE          |
| 0.100                      | 29  | Male   | CPN  | Less than six drugs      | No               | 0                | No           | No                                    | BRONCHO-PNEUMONIA, RULE-OUT (R/O) PTB, LOBAR PNEUMONIA                                      | HEADACHE                             | CEFTRIAXONE            |

| Probability - possible ADR | age | gender | ward | No of drugs administered | Herbal medicines | charlson's index | HIV-positive | Hospitalization | Working diagnosis                                                                                                              | Possible ADR                                 | Implicated drug          |
|----------------------------|-----|--------|------|--------------------------|------------------|------------------|--------------|-----------------|--------------------------------------------------------------------------------------------------------------------------------|----------------------------------------------|--------------------------|
| 0.140                      | 63  | Female | CPN  | Six or more drugs        | No               | 3                | No           | No              | DIABETES MELLITUS, HYPERTENSION, HYPERTENSIVE HEART DISEASE (HHT)                                                              | EPIGASTRIC PAIN                              | DIGOXIN, FRUSEMIDE       |
| 0.156                      | 52  | Male   | CPN  | Less than six drugs      | Yes              | 1                | No           | No              | LOBAR PNEUMONIA, ?PTB                                                                                                          | DIARRHOEA                                    | ERYTHROMYCIN             |
|                            |     |        |      |                          |                  |                  |              |                 |                                                                                                                                | ABD PAIN                                     | DICLOFENAC, ERYTHROMYCIN |
| 0.103                      | 40  | Male   | CPN  | Less than six drugs      | No               | 6                | Yes          | No              | ISS, PTB, PNEUMONIA                                                                                                            | VOMITING                                     | CEFTRIAXONE              |
| 0.138                      | 68  | Male   | CPN  | Six or more drugs        | No               | 3                | No           | No              | TENSION PNEUMOTHORAX, LEFT HEART FAILURE                                                                                       | CONSTIPATION                                 | TRAMADOL                 |
| 0.101                      | 22  | Male   | IDGI | Less than six drugs      | No               | 0                | No           | No              | SEPTICAEMIA SECONDARY TO UTI, ELECTROLYTE IMBALANCE                                                                            | NAUSEA (REDUCED INFUSION RATE & ADR REDUCED) | CIPROFLOXACIN            |
| 0.162                      | 55  | Female | IDGI | Less than six drugs      | Yes              | 8                | Yes          | No              | ISS WITH GASTROENTERITIS (G/E), ORAL CANDIDIASIS, BRONCHOPNEUMONIA                                                             | NAUSEA                                       | METRONIDAZOLE            |
| 0.102                      | 18  | Female | IDGI | Less than six drugs      | No               | 0                | No           | No              | SEVERE MALARIA, SEVERE ANAEMIA, ACUTE KIDNEY INJURY                                                                            | VOMITING                                     | PARACETAMOL              |
| 0.149                      | 40  | Female | IDGI | Less than six drugs      | No               | 0                | No           | Yes             | ORGANIC PSYCHOSIS, RESOLVING LYME MENINGITIS                                                                                   | BLURRED VISION                               | BENZTROPINE              |
|                            |     |        |      |                          |                  |                  |              |                 |                                                                                                                                | TREMORS                                      | HALOPERIDOL              |
| 0.149                      | 28  | Male   | IDGI | Less than six drugs      | No               | 0                | No           | Yes             | ORGANOPHOSPHATE POISONING, ATTEMPTED SUICIDE                                                                                   | DROWZINESS                                   | ATROPINE                 |
| 0.145                      | 34  | Female | IDGI | Six or more drugs        | No               | 0                | Yes          | No              | ORAL CANDIDIASIS, UTI, R/O MALARIA                                                                                             | NAUSEA AND VOMITING                          | KETOCONAZOLE             |
| 0.102                      | 56  | Male   | IDGI | Less than six drugs      | No               | 7                | Yes          | No              | ISS, MALARIA, SEPTICAEMIA, PTB, TUBERCULOSIS ADENITIS, LYMPHOMA                                                                | DIARRHOEA                                    | CEFTRIAXONE              |
| 0.144                      | 35  | Male   | IDGI | Six or more drugs        | No               | 0                | Yes          | No              | PERITONITIS, ACUTE PERSISTENT PANCREATITIS                                                                                     | SEVERE ABD PAIN                              | CIPROFLOXACIN            |
| 0.164                      | 28  | Female | IDGI | Less than six drugs      | Yes              | 6                | Yes          | No              | ISS, HYPOTENSION, ABDOMINAL TUBERCULOSIS, CHOLESTATIC DISEASE, UTI, MALARIA, MODERATE ANAEMIA                                  | VOMITING                                     | CEFTRIAXONE              |
| 0.146                      | 27  | Female | IDGI | Six or more drugs        | No               | 0                | Yes          | No              | ISS ON HAART & CO-TRIMOXAZOLE, CRYPTOCOCCAL MENINGITIS, G/E, MENINGOENCEPHALITIS, ACUTE BACTERIAL MENINGITIS, TENSION HEADACHE | VOMITING                                     | TRAMADOL                 |
| 0.159                      | 18  | Male   | HNE  | drugs                    | Yes              | 0                | No           | No              | ISS, BRONCHO-PNEUMONIA                                                                                                         | DECREASED URINE OUTPUT                       | CEFTRIAXONE              |

Appendix S5: Characteristics of 35 patients with possible hospital-acquired suspected ADRs in the top 10% (high-risk group) of possible ADR risk distribution, Uganda, 2014

| Probability - possible ADR | age | gender | ward | No of drugs administered | Herbal medicines | charlson's index | HIV-positive | Hospitalization | Working diagnosis                                                         | Possible ADR                                                                                                                                                                                                                       | Implicated drug                                                                                                                                                                                                                                        |
|----------------------------|-----|--------|------|--------------------------|------------------|------------------|--------------|-----------------|---------------------------------------------------------------------------|------------------------------------------------------------------------------------------------------------------------------------------------------------------------------------------------------------------------------------|--------------------------------------------------------------------------------------------------------------------------------------------------------------------------------------------------------------------------------------------------------|
| 0.509                      | 29  | Female | GYN  | Six or more drugs        | No               | 1                | No           | Yes             | PUEPERIAL SEPSIS, PELVIC ABSCESS                                          | VOMITING                                                                                                                                                                                                                           | CEFTRIAXONE                                                                                                                                                                                                                                            |
| 0.511                      | 21  | Female | GYN  | Six or more drugs        | No               | 0                | No           | Yes             | SEVERE MALARIA IN PREGNANCY, SEVERE ANAEMIA                               | VOMITING ALL FEEDS                                                                                                                                                                                                                 | QUININE                                                                                                                                                                                                                                                |
| 0.407                      | 28  | Female | GYN  | Six or more drugs        | No               | 6                | Yes          | No              | INCOMPETENT CERVIX, THREATENED ABORTION                                   | MILD RADIATING HEADACHE<br>RAISED PULSE                                                                                                                                                                                            | OXYTOCIN<br>OXYTOCIN                                                                                                                                                                                                                                   |
| 0.525                      | 41  | Female | GYN  | Six or more drugs        | Yes              | 0                | No           | No              | PELVIC INFLAMMATORY DISEASE, ENDOMETRIOSIS, PERITONITIS, PELVIC ABSCESS   | NAUSEA<br>VOMITING                                                                                                                                                                                                                 | TRAMADOL & CEFTRIAXONE<br>TRAMADOL & CEFTRIAXONE                                                                                                                                                                                                       |
| 0.518                      | 27  | Female | GYN  | Six or more drugs        | No               | 6                | Yes          | Yes             | THREATENED ABORTION                                                       | VAGINAL BLEEDING WITH BLOOD CLOTS<br>LOWER ABDOMINAL PAIN WITH SPASMS                                                                                                                                                              | MISOPROSTOL<br>MISOPROSTOL                                                                                                                                                                                                                             |
| 0.528                      | 21  | Female | GYN  | Six or more drugs        | Yes              | 0                | No           | No              | MALARIA IN PREGNANCY, BACTEREMIA                                          | DECREASED APPETITE<br>VOMITING                                                                                                                                                                                                     | ERYTHROMYCIN<br>ERYTHROMYCIN                                                                                                                                                                                                                           |
| 0.528                      | 25  | Female | GYN  | Six or more drugs        | Yes              | 0                | No           | No              | INEVITABLE ABORTION, INCOMPLETE ABORTION                                  | VOMITING                                                                                                                                                                                                                           | CEFTRIAXONE                                                                                                                                                                                                                                            |
| 0.636                      | 24  | Female | GYN  | Six or more drugs        | Yes              | 0                | No           | Yes             | ANAEMIA SECONDARY TO SEVERE MALARIA, UTI IN PREGNANCY                     | CHILLS - MILD HYPERSENSITIVITY<br>VOMITING                                                                                                                                                                                         | BLOOD<br>BLOOD                                                                                                                                                                                                                                         |
| 0.528                      | 22  | Female | GYN  | Six or more drugs        | Yes              | 0                | No           | No              | THREATENED ABORTION                                                       | DYSURIA                                                                                                                                                                                                                            | NIFEDIPINE                                                                                                                                                                                                                                             |
| 0.400                      | 18  | Female | GYN  | Six or more drugs        | No               | 0                | No           | No              | INCOMPLETE ABORTION                                                       | LOWER ABDOMINAL PAIN                                                                                                                                                                                                               | OXYTOCIN                                                                                                                                                                                                                                               |
| 0.509                      | 29  | Female | GYN  | Six or more drugs        | No               | 0                | No           | Yes             | POST-PARTUM HAEMORRHAGE, DYSFUNCTIONAL UTERINE BLEEDING, MODERATE ANAEMIA | ABDOMINAL PAIN                                                                                                                                                                                                                     | MISOPROSTOL                                                                                                                                                                                                                                            |
| 0.636                      | 29  | Female | GYN  | Six or more drugs        | Yes              | 0                | No           | Yes             | ?ELECTROLYTE IMBALANCE, ?SEPSIS                                           | DIZZINESS                                                                                                                                                                                                                          | CEFTRIAXONE, METRONIDAZOLE                                                                                                                                                                                                                             |
| 0.528                      | 26  | Female | GYN  | Six or more drugs        | Yes              | 0                | No           | No              | INCOMPLETE ABORTION, MENORRHAGIA                                          | VAGINAL BLEEDING<br>PALPITATIONS                                                                                                                                                                                                   | MISOPROSTOL<br>MISOPROSTOL                                                                                                                                                                                                                             |
| 0.400                      | 19  | Female | GYN  | Six or more drugs        | No               | 0                | No           | No              | INCOMPLETE ABORTION                                                       | VOMITING<br>MID LOWER ABDOMINAL PAIN<br>DIZZINESS<br>LOSS OF APPETITE<br>HEADACHE<br>NOT ORIENTED TO TIME & PLACE - POOR SPEECH<br>FEVER<br>LOW BLOOD PRESSURE<br>STIFF NECK WITH SWOLLEN TONGUE<br>UNCOORDINATED MOVEMENTS IN BED | AMPICILLIN, METRONIDAZOLE, CEFTRIAXONE, LEVOFLOXACIN<br>LEVOFLOXACIN<br>METRONIDAZOLE, HALOPERIDOL<br>LEVOFLOXACIN, MISOPROSTOL, METRONIDAZOLE, HALOPERIDOL<br>CIPROFLOXACIN, LEVOFLOXACIN<br>HALOPERIDOL<br>HALOPERIDOL<br>HALOPERIDOL<br>HALOPERIDOL |

| Probability - possible ADR | age | gender | ward | No of drugs administered | Herbal medicines | charlson's index | HIV-positive | Hospitalization | Working diagnosis                                                                        | Possible ADR                      | Implicated drug                                        |
|----------------------------|-----|--------|------|--------------------------|------------------|------------------|--------------|-----------------|------------------------------------------------------------------------------------------|-----------------------------------|--------------------------------------------------------|
| 0.527                      | 30  | Female | GYN  | Six or more drugs        | Yes              | 0                | No           | No              | SEVERE ANAEMIA, ENDOMETRIOSIS, FIBROSIS                                                  | FEVER                             | IRON SUCROSE                                           |
|                            |     |        |      |                          |                  |                  |              |                 |                                                                                          | DIZZINESS                         | TRANEXAMIC ACID, IRON SUCROSE                          |
|                            |     |        |      |                          |                  |                  |              |                 |                                                                                          | PALPITATIONS & EASY FATIGUABILITY | IRON SUCROSE                                           |
|                            |     |        |      |                          |                  |                  |              |                 |                                                                                          | EPIGASTRIC PAIN                   | FEFOL                                                  |
|                            |     |        |      |                          |                  |                  |              |                 |                                                                                          | HEADACHE                          | IRON SUCROSE                                           |
|                            |     |        |      |                          |                  |                  |              |                 |                                                                                          | PAINFUL LOWER LIMBS               | IRON SUCROSE                                           |
| 0.636                      | 24  | Female | GYN  | Six or more drugs        | Yes              | 1                | No           | Yes             | POST OPERATIVE SEPSIS, RUPTURED ECTOPIC                                                  | VOMITING                          | LEVOFLOXACIN, CEFTRIAXONE                              |
|                            |     |        |      |                          |                  |                  |              |                 |                                                                                          | LOSS OF APPETITE                  | LEVOFLOXACIN, CEFTRIAXONE                              |
|                            |     |        |      |                          |                  |                  |              |                 |                                                                                          | ALLERGIC SKIN REACTION ON ARM     | LEVOFLOXACIN, CEFTRIAXONE                              |
|                            |     |        |      |                          |                  |                  |              |                 |                                                                                          | HEADACHE                          | LEVOFLOXACIN, CEFTRIAXONE, HALOPERIDOL                 |
|                            |     |        |      |                          |                  |                  |              |                 |                                                                                          | GENERAL BODY WEAKNESS             | LEVOFLOXACIN, DIAZEPAM                                 |
|                            |     |        |      |                          |                  |                  |              |                 |                                                                                          | DIZZINESS                         | DIAZEPAM, LEVOFLOXACIN, CEFTRIAXONE                    |
| 0.510                      | 22  | Female | GYN  | Six or more drugs        | No               | 0                | No           | Yes             | INCOMPLETE ABORTION                                                                      | FEVER                             | CEFTRIAXONE                                            |
|                            |     |        |      |                          |                  |                  |              |                 |                                                                                          | BACK PAIN                         | MISOPROSTOL, OXYTOCIN                                  |
| 0.511                      | 21  | Female | GYN  | Six or more drugs        | No               | 1                | No           | Yes             | SEVERE ANAEMIA                                                                           | CONSTIPATION                      | FEFOL                                                  |
|                            |     |        |      |                          |                  |                  |              |                 |                                                                                          | HEADACHE                          | MICROGYNON                                             |
|                            |     |        |      |                          |                  |                  |              |                 |                                                                                          | EPIGASTRIC PAIN                   | FEFOL                                                  |
| 0.508                      | 39  | Female | GYN  | Six or more drugs        | No               | 1                | No           | Yes             | MOLAR PREGNANCY, INCOMPLETE ABORTION                                                     | DIZZINESS                         | CEFTRIAXONE                                            |
| 0.637                      | 22  | Female | GYN  | Six or more drugs        | Yes              | 0                | No           | Yes             | SEVERE ANAEMIA, SECONDARY MENORRHAGIA                                                    | HEADACHE                          | MICROGYNON                                             |
| 0.527                      | 28  | Female | GYN  | Six or more drugs        | Yes              | 0                | No           | No              | CHRONIC LEAKING ECTOPIC PREGNANCY, THREATENED ABORTION                                   | PARAESTHESIA                      | LIGNOCAINE                                             |
| 0.636                      | 25  | Female | GYN  | Six or more drugs        | Yes              | 0                | No           | Yes             | INCOMPLETE ABORTION, MENORRHAGIA, MODERATE ANAEMIA                                       | DIZZINESS                         | MISOPROSTOL                                            |
| 0.442                      | 40  | Male   | CPN  | Six or more drugs        | Yes              | 0                | No           | Yes             | ACUTE KIDNEY INJURY SECONDARY TO TOXINS FROM HERBS, GLOMERULAR NEPHRITIS, SEVERE ANAEMIA | VOMITING                          | CEFTRIAXONE, CAPTOPRIL, FRUSEMIDE                      |
|                            |     |        |      |                          |                  |                  |              |                 |                                                                                          | DIARRHOEA                         | FRUSEMIDE, CAPTOPRIL, CALCIUM GLUCONATE                |
|                            |     |        |      |                          |                  |                  |              |                 |                                                                                          | ABD PAIN                          | CEFTRIAXONE, CAPTOPRIL, FRUSEMIDE                      |
| 0.448                      | 19  | Female | CPN  | Six or more drugs        | Yes              | 0                | No           | Yes             | SEVERE PNEUMONIA, SEPTICAEMIA, POORLY MANAGED MALARIA, PULMONARY TUBERCULOSIS (PTB)      | CONSTIPATION                      | METRONIDAZOLE                                          |
|                            |     |        |      |                          |                  |                  |              |                 |                                                                                          | SHORTNESS OF BREATH               | ISONIAZID, RIFAMPICIN, PYRAZINAMIDE, ETHAMBUTOL (HRZE) |
| 0.444                      | 28  | Male   | CPN  | Six or more drugs        | Yes              | 0                | No           | Yes             | HYPERTENSION, CHRONIC KIDNEY DISEASE, ACUTE KIDNEY INJURY                                | OEDEMA                            | CARVEDILOL                                             |
| 0.439                      | 61  | Male   | CPN  | Six or more drugs        | Yes              | 2                | No           | Yes             | COR PULMONALE, ACUTE SEVERE ASTHMA                                                       | RAISED SYSTOLIC BLOOD PRESSURE    | AMINOPHYLLINE                                          |
| 0.442                      | 60  | Female | CPN  | Six or more drugs        | Yes              | 2                | No           | Yes             | LUNG MALIGNANCY                                                                          | DIZZINESS                         | CEFTRIAXONE, TRAMADOL                                  |
|                            |     |        |      |                          |                  |                  |              |                 |                                                                                          | PARAESTHESIA                      | CEFTRIAXONE                                            |
|                            |     |        |      |                          |                  |                  |              |                 |                                                                                          | CONSTIPATION                      | TRAMADOL                                               |

| Probability - possible ADR | age | gender | ward | No of drugs administered | Herbal medicines | charlson's index | HIV-positive | Hospitalization | Working diagnosis                                                                                                                                                                         | Possible ADR          | Implicated drug              |
|----------------------------|-----|--------|------|--------------------------|------------------|------------------|--------------|-----------------|-------------------------------------------------------------------------------------------------------------------------------------------------------------------------------------------|-----------------------|------------------------------|
| 0.443                      | 33  | Male   | HNE  | Six or more drugs        | Yes              | 0                | No           | Yes             | SEVERE ANAEMIA, MALARIA                                                                                                                                                                   | VOMITING              | BLOOD                        |
|                            |     |        |      |                          |                  |                  |              |                 |                                                                                                                                                                                           | SEVERE HEADACHE       | BLOOD                        |
|                            |     |        |      |                          |                  |                  |              |                 |                                                                                                                                                                                           | BLEEDING FROM THE GUM | BLOOD                        |
|                            |     |        |      |                          |                  |                  |              |                 |                                                                                                                                                                                           | VOMITING              | BLOOD                        |
| 0.446                      | 32  | Female | HNE  | Six or more drugs        | Yes              | 0                | No           | Yes             | ANAEMIA, MALARIA, ? UPPER GASTROINTESTINAL BLEEDING                                                                                                                                       | VOMITING              | LUMARTEM, CIPROFLOXACIN      |
| 0.442                      | 59  | Female | HNE  | Six or more drugs        | Yes              | 1                | No           | Yes             | SEVERE ANAEMIA                                                                                                                                                                            | VOMITING              | LEVOFLOXACIN, CYPROHEPTADINE |
|                            |     |        |      |                          |                  |                  |              |                 |                                                                                                                                                                                           | GENERAL BODY WEAKNESS | LEVOFLOXACIN, CYPROHEPTADINE |
| 0.448                      | 20  | Female | HNE  | Six or more drugs        | Yes              | 0                | No           | Yes             | SICKLER IN VASOCCLUSIVE CRISIS                                                                                                                                                            | JAUNDICE              | BISACODYL                    |
| 0.443                      | 36  | Male   | IDGI | Six or more drugs        | Yes              | 1                | No           | Yes             | SEVERE MALARIA, HEPATITIS, UTI                                                                                                                                                            | VOMITING              | COARTEM                      |
| 0.455                      | 29  | Female | IDGI | Six or more drugs        | Yes              | 7                | Yes          | Yes             | HIV COMPLICATED WITH CCM & TUBERCULOSIS                                                                                                                                                   | VOMITING              | TRAMADOL                     |
|                            |     |        |      |                          |                  |                  |              |                 |                                                                                                                                                                                           | MALAISE               | AMPHOTERICIN B               |
| 0.444                      | 28  | Male   | IDGI | Six or more drugs        | Yes              | 0                | No           | Yes             | CHRONIC ABD PAIN, INFLAMMATORY BOWEL DISEASE, HAEMORRHOIDS, PANCREATITIS, AORTIC DISSECTION                                                                                               | TACHYCARDIA           | CIPROFLOXACIN                |
|                            |     |        |      |                          |                  |                  |              |                 |                                                                                                                                                                                           | HYPERTENSION          | MORPHINE                     |
| 0.452                      | 45  | Female | IDGI | Six or more drugs        | Yes              | 7                | Yes          | Yes             | IMMUNOSUPPRESSED SNDROME (ISS),CHOLELITHIASIS, STEATOSIS OF LIVER, TB IRIS, ACUTE LIVER INJURY, DRUG-INDUCED HEPATITIS,SOME DEHYDRATION, VIRAL HEPATITIS, SEPSIS, CRYPTOCOCCAL MENINGITIS | HYPOVOLAEMIA          | FRUSEMIDE                    |
